# Supplementary material for: Role of manganese-based surfactant towards solubilization and photophysical properties of fluorescein
Source: Royal Society of Chemistry journal article supplement (doi:10.1039/c5ra24938d), 2015-12-28
Supplement: c5ra24938d1.pdf [file c5ra24938d1.pdf]

## ROLE OF MANGANESE BASED SURFACTANT TOWARDS SOLUBILIZATION AND PHOTO-PHYSICAL PROPERTIES OF FLUORESCEIN

Gurpreet Kaur\*, Preeti Garg and Ganga Ram Chaudhary\*

Department of Chemistry and Centre of Advanced studies in Chemistry, Panjab University,  
Chandigarh

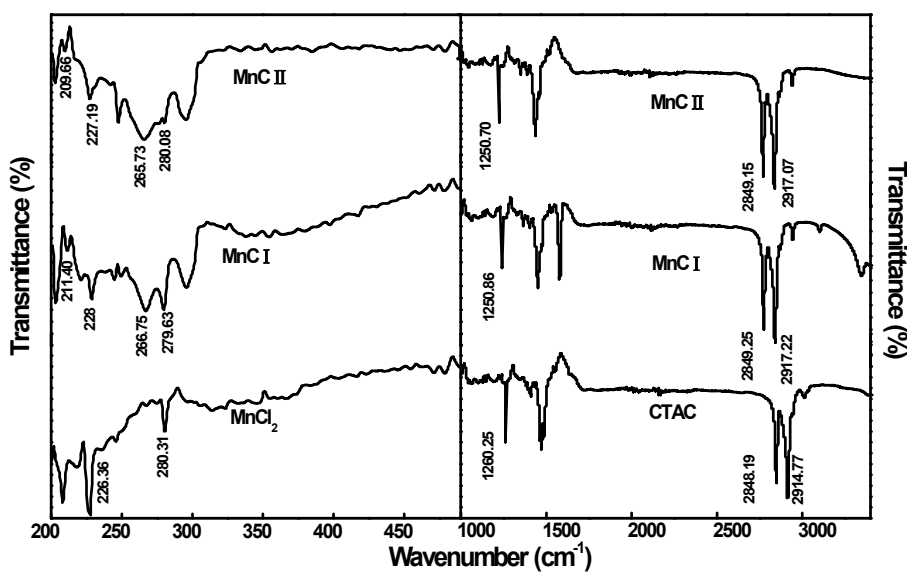

Figure ES1. FTIR spectra of CTAC, MnCl<sub>2</sub>, MnC I and MnC II.

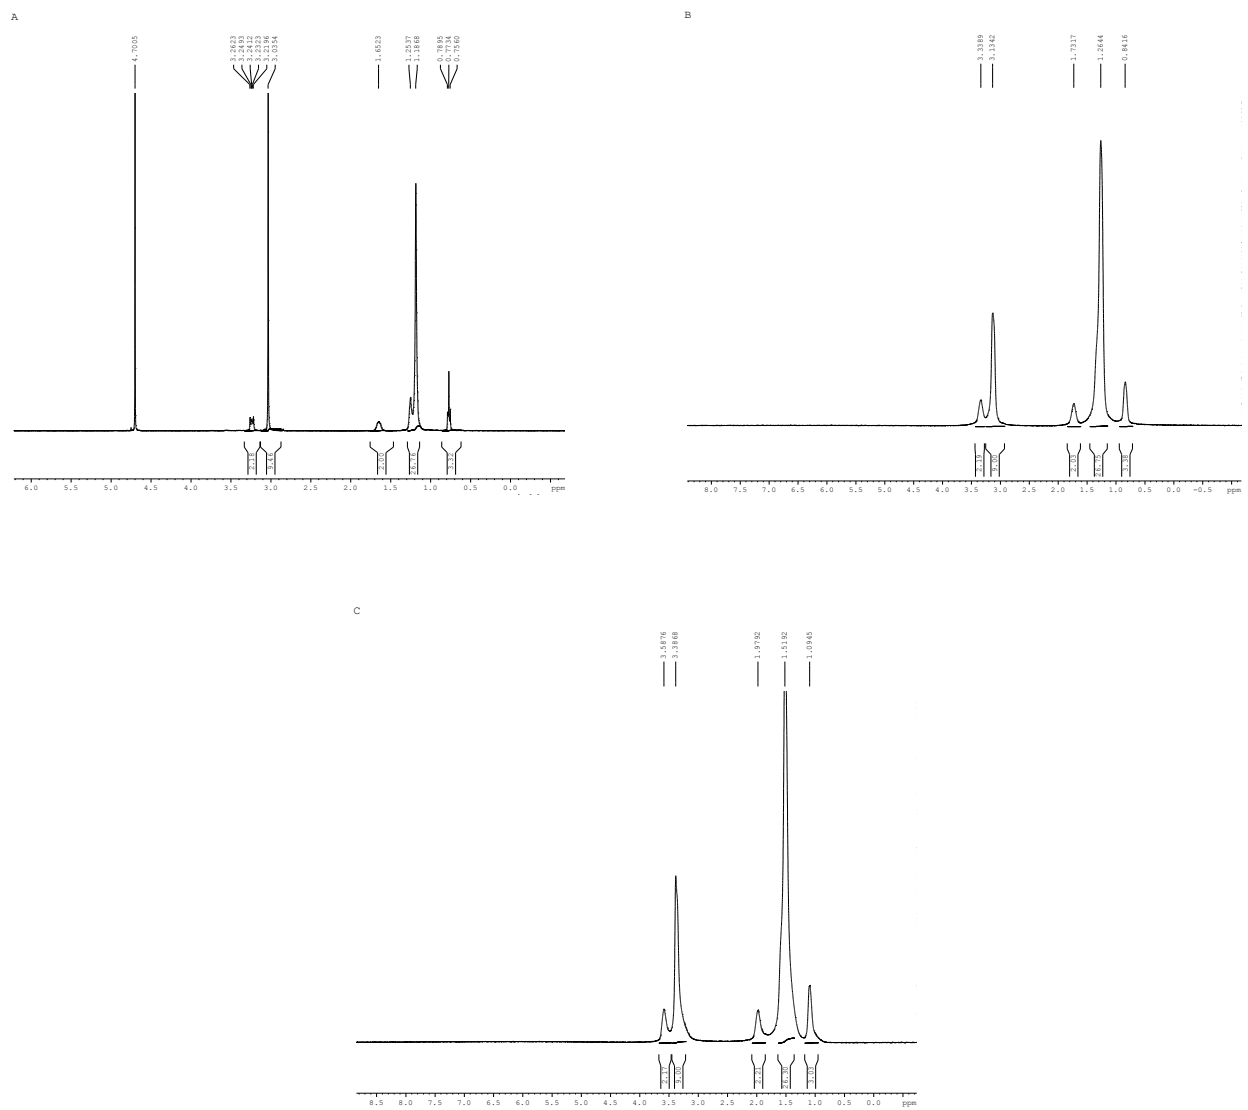

**Figure ES2.** NMR spectra of (A) CTAC, (B) MnC I and (C) MnC II.

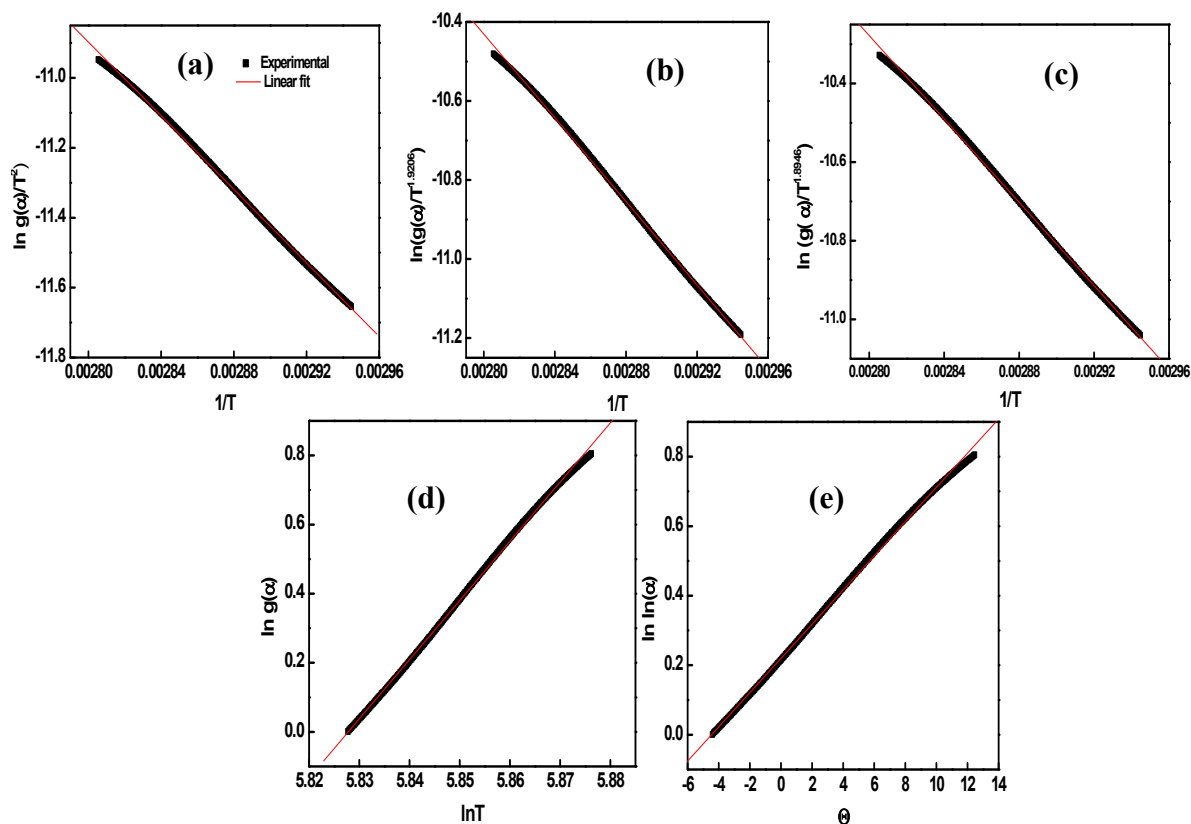

**Figure ES3.** Linearization curves obtained by (a) Coats–Redfern (CR), (b) Madhusudanan–Krishnan–Ninan (MKN), (c) Wanjun–Yuwen–Hen–Cunxin (WYHC), (d) van Krevelen (vK) methods and (e) Horowitz–Metzger (HM) methods for MnC I.

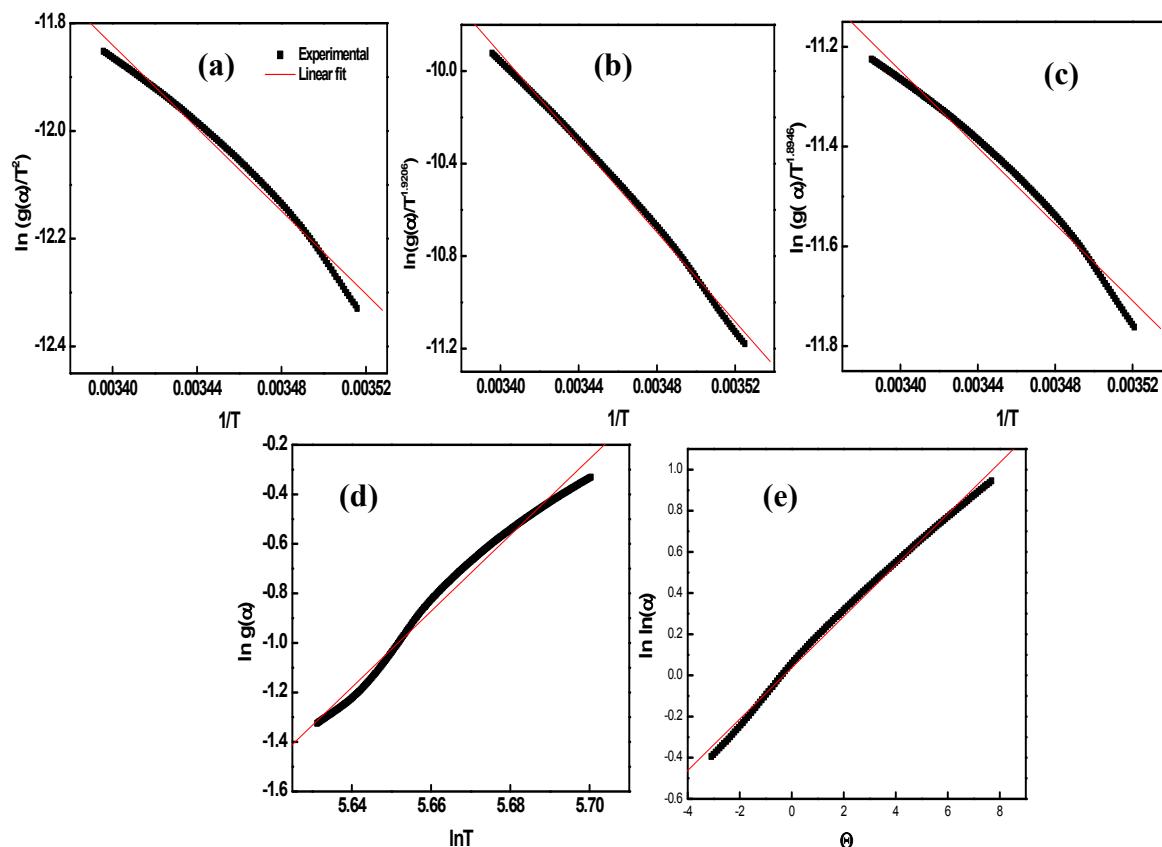

**Figure ES4.** Linearization curves obtained by (a) Coats–Redfern (CR), (b) Madhusudanan–Krishnan–Ninan (MKN), (c) Wanjun–Yuwen–Hen–Cunxin (WYHC), (d) van Krevelen (vK) methods and (e) Horowitz–Metzger (HM) methods for MnC II.

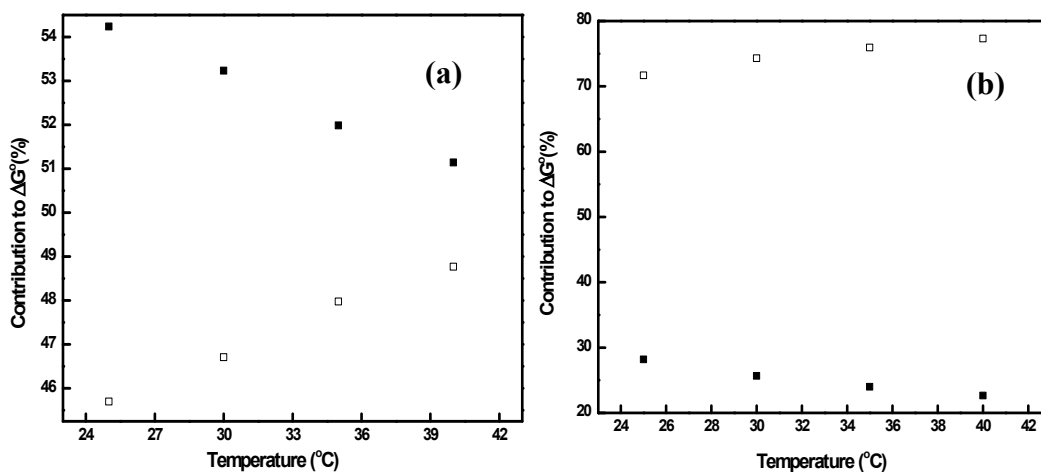

**Figure ES5.** Enthalpic ( □ ) and Entropic ( ■ ) contributions to  $\Delta G^0$  for (a) MnC I (b) MnC II.

**Table ES1. Vibrational peaks of MnCl<sub>2</sub>, CTAC, MnC I and MnC II**

| Modes of Vibration                    | Peak position (cm <sup>-1</sup> ) |         |             |                |
|---------------------------------------|-----------------------------------|---------|-------------|----------------|
|                                       | MnCl <sub>2</sub>                 | CTAC    | MnC I       | MnC II         |
| CH <sub>2</sub> asymmetric stretching | -----                             | 2914.77 | 2917.22     | 2917.07        |
| CH <sub>3</sub> symmetric stretching  | -----                             | 2848.19 | 2849.25     | 2849.15        |
| -C-N stretching                       | -----                             | 1260.25 | 1250.86     | 1250.70        |
| M-Cl stretching (terminal)            | 226.35, 280.31                    | -----   | 228, 279.63 | 227.19, 280.08 |
| M-Cl stretching (Bridging)            | -----                             | -----   | 211, 266.75 | 209.66, 265.73 |

**Table ES2. Thermodynamic decomposition parameters for the Manganese complexes using TGA.**

| Complex | A/min <sup>-1</sup>    | $\Delta G$ /kJmol <sup>-1</sup> | $\Delta H$ /kJmol <sup>-1</sup> | $\Delta S$ /JK <sup>-1</sup> mol <sup>-1</sup> |
|---------|------------------------|---------------------------------|---------------------------------|------------------------------------------------|
| MnC I   | 1.033×10 <sup>10</sup> | 43.833                          | 40.901                          | -8.52                                          |
| MnC II  | 1.47×10 <sup>7</sup>   | 33.081                          | 29.650                          | -14.52                                         |

**Table ES3. Values of T<sub>c</sub>,  $\sigma$  and  $\Delta C_p^\circ$  for Manganese surfactant complexes using conductivity measurement.**

|               | T <sub>c</sub> (K) | $\sigma$ | (-) $\Delta C_p^\circ$ (KJmol <sup>-1</sup> K <sup>-1</sup> ) |
|---------------|--------------------|----------|---------------------------------------------------------------|
| Mn:CTAC (1:1) | 281.69             | 0.03855  | 0.1414                                                        |
| Mn:CTAC (1:2) | 149.47             | 0.12307  | 0.1781                                                        |

**Table ES4. <sup>1</sup>H NMR chemical shifts (ppm) of fluorescein (FL) in D<sub>2</sub>O solution without and with Manganese complexes. The numbers refer to FL atom numbering, symbols in parentheses indicate signal multiplicity.**

| Sample       | 1(d) | 2(t) | 3(t) | 5/10(d) | 4(d) | 7/8(s) | 6/9(d) |
|--------------|------|------|------|---------|------|--------|--------|
| FL           | 7.80 | 7.60 | 7.50 | 7.26    | 6.69 | 6.7    | 6.65   |
| FL in MnC I  | 8.11 | 7.38 | 7.30 | 7.0     | 6.79 | 6.45   | 6.38   |
| FL in MnC II | 8.04 | 7.37 | 7.28 | 6.98    | 6.79 | 6.61   | 6.45   |
